# Supplementary material
Source: PubMed Central journal article supplement (PMC8034866)
Supplement: NIHMS1586801-supplement-SuppFiguresAndTables.pdf [file NIHMS1586801-supplement-SuppFiguresAndTables.pdf]

## Supplementary figure legends

**Supplementary Figure S1.** PRMT5 expression in AML. (A) Analysis of PRMT5 expression in the TCGA AML Cohort to determine the variation among different AML subsets. Associated clinical data were used to group patients based on the reported cytogenetic abnormalities (table on the right). The bar plot shows the average of the normalized read counts for all samples in each cytogenetic group. Error bars represent the standard error of the expression. Welch's ttest was performed to compare the expression between each cytogenetic group. No comparison achieved significance. (B) PRMT5 transcript levels in AML samples (total n=10: primary patients' samples; n=4 and patient-derived cell lines; n=6) when compared to normal bone marrow (n=4).

**Supplementary Figure S2.** Activities of mutant PRMT5 in AML. (A) Symmetric dimethylation of arginine 3 of histone H4 induced by wild-type full-length PRMT5, PRMT5 (WT), or a catalytically inactive mutant form (G367A/R368A); PRMT5 (Mut), in THP-1 AML cells. (B) Colony forming assay in THP-1 cells transduced with either PRMT5 (WT) or PRMT5 (Mut) when compared to negative control (EV transduced cells). Number of colonies was scored after 10 days

**Supplementary Figure S3.** (A) HLCL-61 binding to PRMT5 active site. HLCL-61 is represented as gray ball-and-stick model; BLL-1 as thin blue stick model; and Phe327, Trp579 and Lys333 as thinner stick models. PRMT5 catalytic site is depicted as ribbon model. Insets are chemical structures of BLL-1 and HLCL-61. (B) In vitro enzyme assay measuring methylase activity in presence of PRMT5 inhibitor compounds and different

PRMT enzymes including type I PRMT1 and 4 and type II PRMT7. HLCL-61 shown by arrow was most potent in inhibiting enzymatic activity of PRMT5. PRMT5 inhibitors were not effective towards PRMT1, PRMT4 and PRMT7 enzymatic potential.

**Supplementary Figure S4.** PRMT5 inhibition in different AML cell lines and patient samples. (A) Dose-dependent reduction in cell viability in different AML cell lines and blasts following PRMT5 inhibition with HLCL-61. IC<sub>50</sub> values of these HLCL-61-treated AML cell lines and patient blasts is provided in the table on the right. MTS assay was used to measure cell viability after 48 hours incubation of cells with increasing doses of HLCL-61. (B-D) Dose-dependent decrease in cell viability following PRMT5 inhibitor treatment of three AML cell lines harboring fusion proteins; Kasumi-1 [t(8;21); AML1/ETO], NB4 [t(15;17); PML/RARA] and ME-1 [inv(16);CBFB/MYH11]. (E) Growth curve assay in Kasumi-1 cell transduced with either PRMT5 overexpression or EV negative control. Cells were counted using Trypan Blue exclusion method over time. (F) Colony forming assay in Kasumi-1 cells overexpressing PRMT5 compared to EV negative control cells. (G) PRMT5 inhibition in Kasumi-1 cells followed by significant reduction in number of colonies formed by Kasumi-1 cells when exposed to HLCL-61. (H) Dose-dependent increase in surface expression of CD11b in Kasumi-1 cells incubated with PRMT5 inhibitor for 48hrs. (I) AnnexinV/PI expression in Kasumi-1 cells treated with 25 and 50µM of HLCL-61 to inhibit PRMT5. Cells were analyzed by FACS after 48hrs incubation with the compound.

**Supplementary Figure S5.** Depiction of ChIP-seq data from lymphoma cells probed with anti-PRMT5 and anti-dimethylated histone H3 showing a >10 fold enrichment of methylated histones at promoter of miR-29b when compared to negative IgG control.

We have performed ChIP-Seq on chromatin collected from a mantle cell lymphoma (Jeko), and two diffuse large B cell lymphoma (SUDHL-2 and Pfeiffer) cell lines using antisera specific for H3R8(me2) and a control IgG antisera. The figure is illustrating the enrichment of H3R8me2 across 7KB span proximal to miR29A and miR29B1 (-5KB upstream promoter region and the first 3 KB of the UTR).

**Supplementary Figure S6.** MiR-29b and Sp1 relationship with PRMT5. (A) Overexpression of miR-29b in MV4-11 cells which has minimal endogenous miR-29b using miR-29b/mimic. The western blot is measuring Sp1 expression 48hrs following miR-29b overexpression (B) Knockdown of miR-29b in Kasumi-1 AML cell line (with high basal levels of miR-29b) using miR-29b/LNA. Western blotting was used to measure Sp1 levels after 48hrs following transient transfection of the cells. (C) Knockdown of Sp1 in AML cells (THP-1) using electroporation and siRNA specific for Sp1. Both mRNA and protein levels were measured after 48hrs of transfection. (D) miR-29b transcript levels (pri-miR-29b) in THP-1 cells following Sp1 knockdown measured using qPCR and compared to scramble (sc) transfected control cells. (E) Western blotting showing upregulation of PRMT5 and subsequently Sp1 in THP-1 cells transduced with either PRMT5 overexpression or EV negative control construct. (F) miR-29b transcript levels (pri-miR-29b) in PRMT5-overexpressing THP-1 cells following knockdown of Sp1. Sp1 siRNA and electroporation was used to knockdown the gene

and mRNA levels were measured 48hrs post transfection. (G) miR-29b transcript levels (pri-miR-29b) in MV4-11 cells treated with HLCL-61 to inhibit PRMT5, with or without an excess of Sp1. MiR -29b expression was measured within 48hrs of treatment.

**Supplementary Figure S7.** Information for predicted promoter regions of FLT3 and miR-29b and list of primers to amplify predicted transcription factor binding sites (~200bp amplification product) at these regions used in ChIP experiments.

**Supplementary Figure S8.** RNA-seq analysis following PRMT5 knockdown in AML cells. (A) Upregulation of pri-miR-29b transcript expression in MV4-11 cells subjected to PRMT5 downregulation (shPRMT5) compared to scrambled control (scr) measured by raw exon read values. (B) Transcript levels of pri-miR-29b validated by qPCR in total RNA of sequenced samples. (C) Measurements of raw exon reads for FLT3 in PRMT5 knockdown and control samples. (D) Western blot analysis of lysates (RIPA) prepared from sequenced shPRMT5 and scr control. Protein levels of miR-29b targets: DNMT1, DNMT3A, DNMT3B and CDK6 in addition to Sp1 were detected following PRMT5 knockdown. (E and F) DAVID functional pathway analysis of the differentially expressed genes between shPRMT5 and control samples as determined by RNA-seq analysis.

**Supplementary data:**

**Supplementary Table S1.** Cytogenetic/molecular characteristics of the AML samples (primary patient blasts and cell lines) used in this study.

| <b>Sample</b> | <b>Cytogenetic/molecular feature</b>     |
|---------------|------------------------------------------|
| Patient #1    | FLT3-ITD, NPM1 <sup>mut</sup> , CEBPA-WT |
| Patient #2    | FLT3-ITD, NPM1-WT, CEBPA-WT              |
| Patient #3    | FLT3-WT, NPM1-WT, CEBPA-WT               |
| Patient #4    | FLT3-WT, NPM1 <sup>mut</sup> , CEBPA-WT  |
| MV4-11        | FLT3-ITD, MLL/AF4                        |
| THP-1         | FLT3-WT, t(9;11)(p22;q23), MLL/AF9       |
| MOLM13        | FLT3-ITD+                                |
| Kasumi-1      | KIT <sup>mut</sup> (Asn822Lys), AML1/ETO |
| OCI-AML3      | NPM1 <sup>mut</sup> , DNMT3A R882C       |
| KG-1          | P53 mutation                             |

## Supplementary Figure S1

A

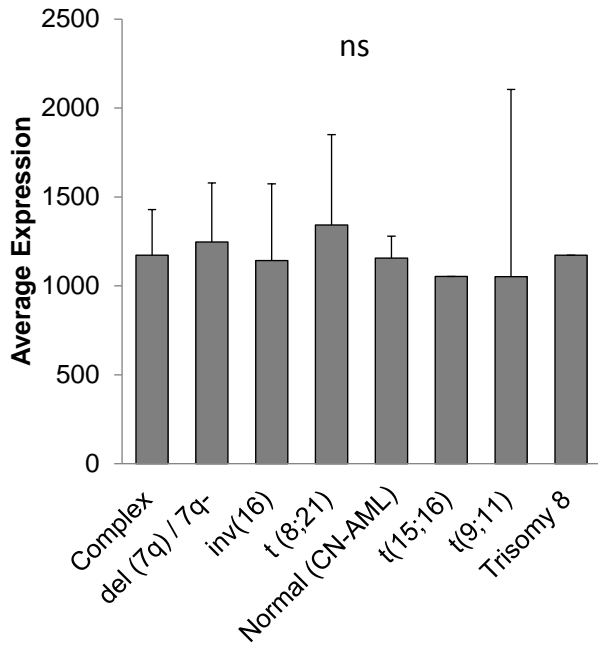

| Description                                                                            | Cytogenetic types                                                                                                                                                                                                                                                                                                                         |
|----------------------------------------------------------------------------------------|-------------------------------------------------------------------------------------------------------------------------------------------------------------------------------------------------------------------------------------------------------------------------------------------------------------------------------------------|
| <b>complex;</b><br>defined as having greater than or equal to 3 distinct abnormalities | Complex del (5q) / 5q-<br>Complex del (5q) / 5q- del (7q) / 7q-<br>Complex del (5q) / 5q- del (7q) / 7q- Trisomy 8<br>Complex del (5q) / 5q- Trisomy 8<br>Complex del (7q) / 7q- Trisomy 8<br>Complex Trisomy 8<br>Normal Complex<br>Normal Complex del (7q) / 7q-<br>Normal Complex del (7q) / 7q- Trisomy 8<br>Normal Complex Trisomy 8 |
| <b>del (7q) / 7q-</b>                                                                  | del (5q) / 5q-<br>del (5q) / 5q- del (7q) / 7q-<br>del (7q) / 7q-<br>Normal del (5q) / 5q- del (7q) / 7q-<br>Normal del (7q) / 7q-<br>Normal del (7q) / 7q-                                                                                                                                                                               |
| <b>inv(16)</b>                                                                         | inv (16)<br>Normal inv (16)                                                                                                                                                                                                                                                                                                               |
| <b>t (8;21)</b>                                                                        | t (8;21)<br>Normal t (8;21)                                                                                                                                                                                                                                                                                                               |
| <b>Normal</b>                                                                          | Normal (CN-AML)                                                                                                                                                                                                                                                                                                                           |
| <b>t(15;16)</b>                                                                        | Trisomy 8 t (15;17)<br>Complex t (15;17)<br>Normal t (15;17)<br>t (15;17)                                                                                                                                                                                                                                                                 |
| <b>t(9;11)</b>                                                                         | Normal t (9;11)<br>Normal del (7q) / 7q- t (9;11)                                                                                                                                                                                                                                                                                         |
| <b>Trisomy 8</b>                                                                       | Trisomy 8                                                                                                                                                                                                                                                                                                                                 |

B

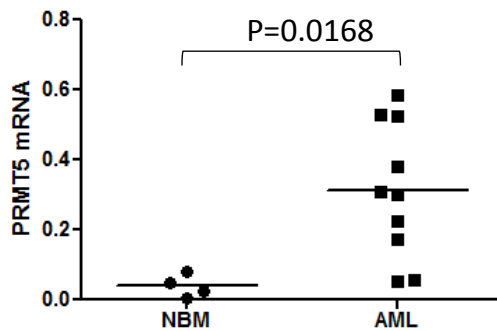

| Sample     | Cytogenetic/molecular feature            |
|------------|------------------------------------------|
| Patient #1 | FLT3-ITD, NPM1 <sup>mut</sup> , CEBPA-WT |
| Patient #2 | FLT3-ITD, NPM1-WT, CEBPA-WT              |
| Patient #3 | FLT3-WT, NPM1-WT, CEBPA-WT               |
| Patient #4 | FLT3-WT, NPM1 <sup>mut</sup> , CEBPA-WT  |
| MV4-11     | FLT3-ITD, MLL/AF4                        |
| THP-1      | FLT3-WT, t(9;11)(p22;q23), MLL/AF9       |
| MOLM13     | FLT3-ITD+                                |
| Kasumi-1   | KIT <sup>mut</sup> (Asn822Lys), AML1/ETO |
| OCI-AML3   | NPM1 <sup>mut</sup> , DNMT3A R882C       |
| KG-1       | P53 mutation                             |

Supplementary Figure S2

A

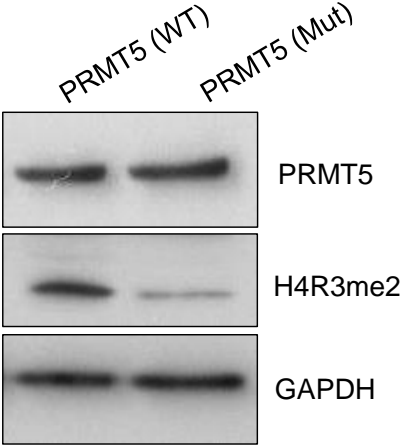

B

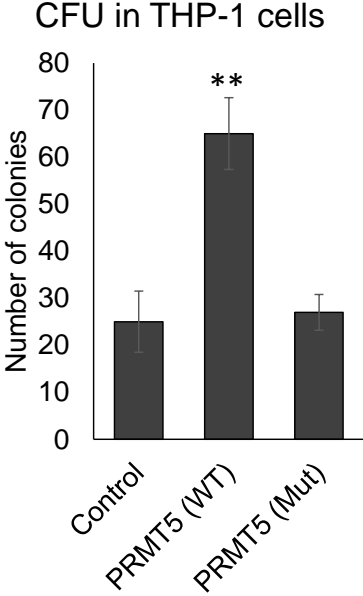

Supplementary Figure S3

A

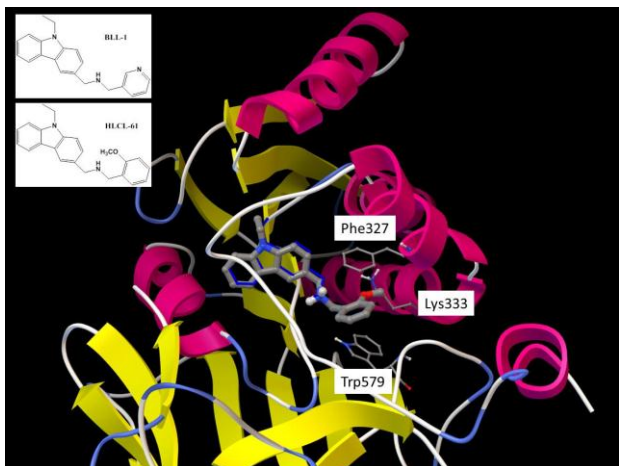

B

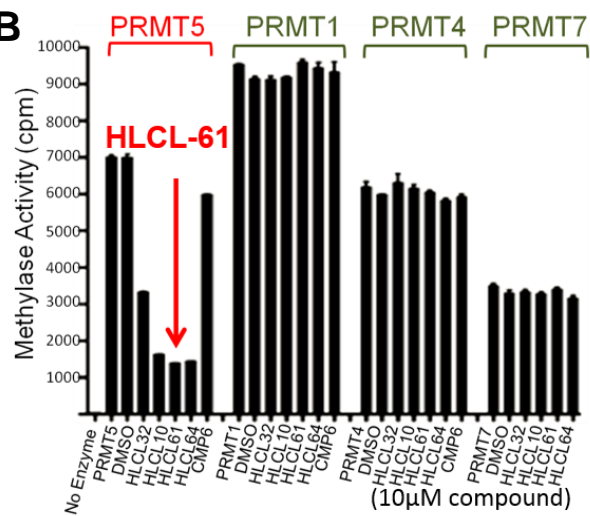



# Supplementary Figure S4

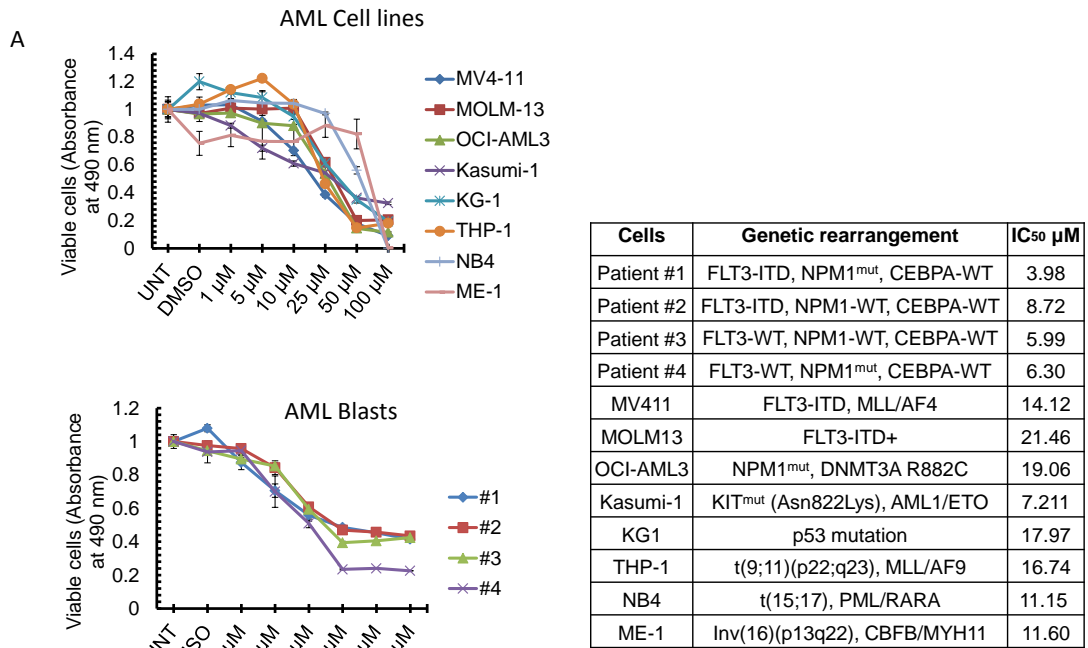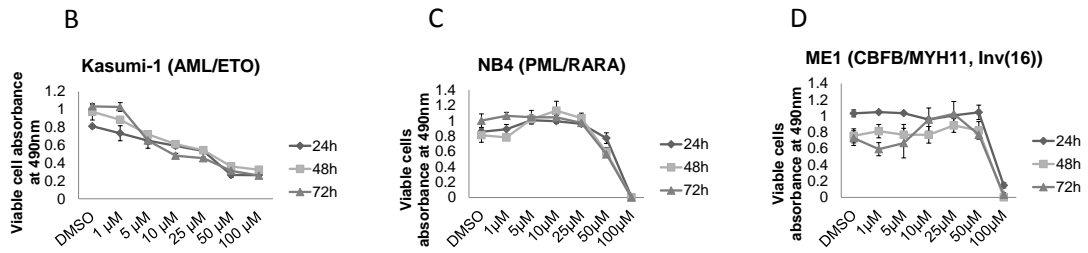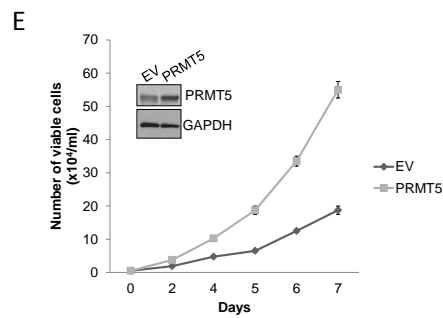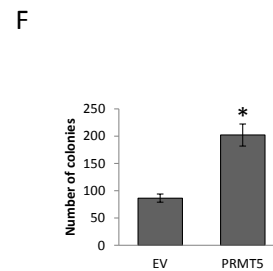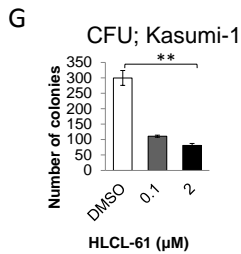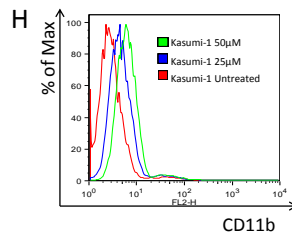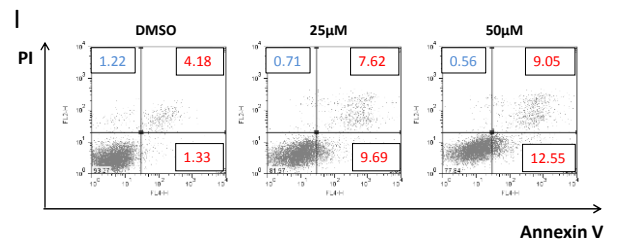

Supplementary Figure S5

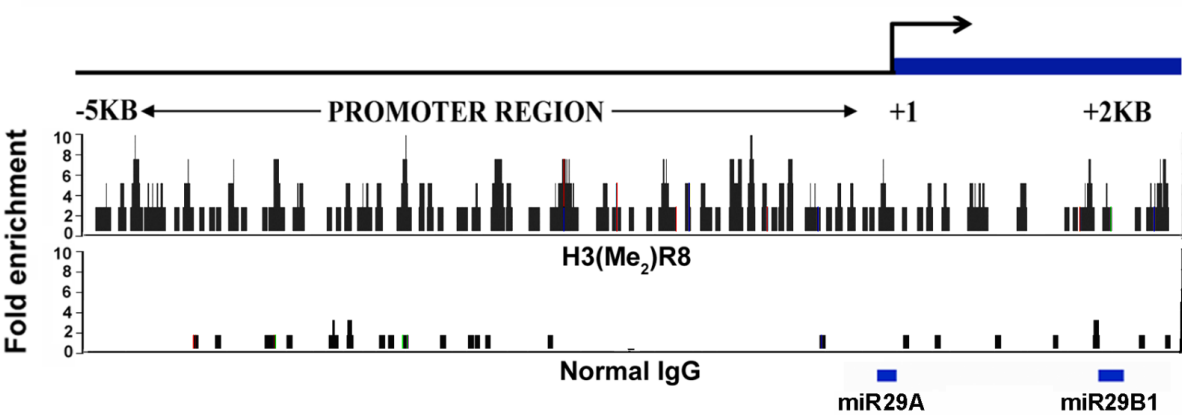

## Supplementary Figure S6

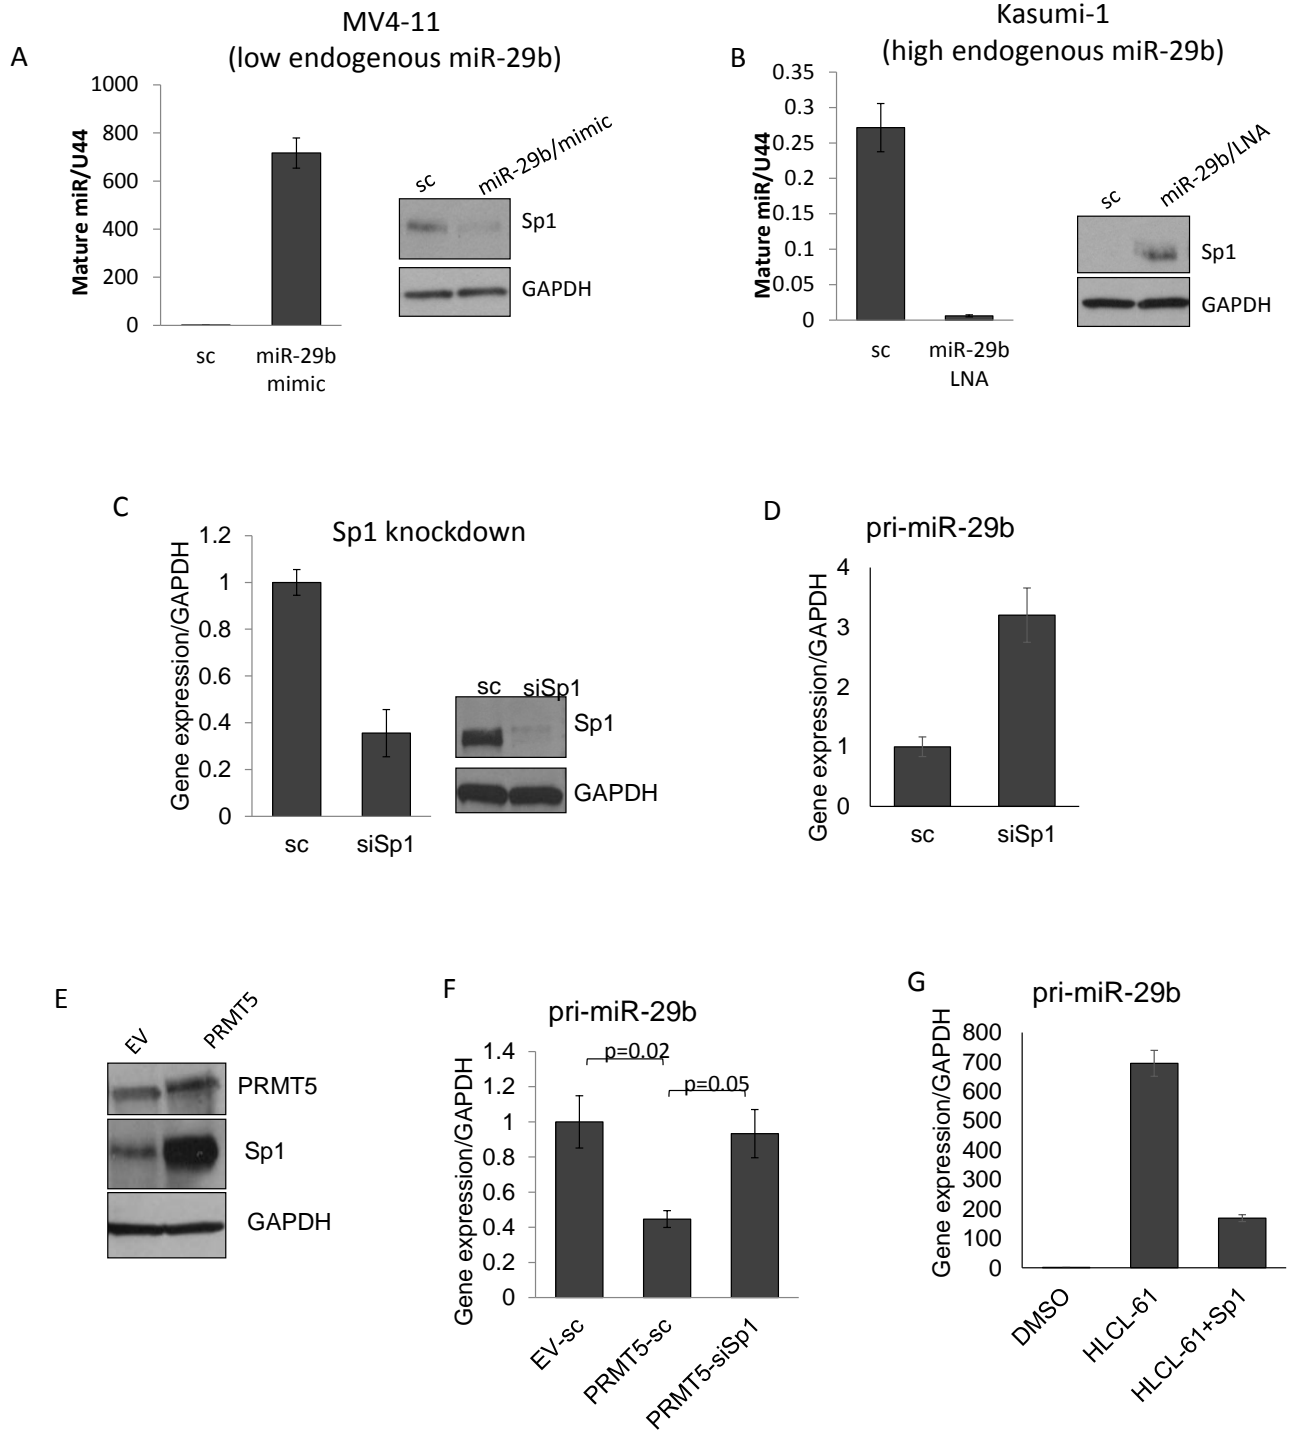

**Supplementary Figure S7**

FLT3 NG007066 (chr13:4252-5337)

FLT3-ChIP-F: CAGAGTTCGGGGACTCACAG

FLT3-ChIP-R: GAGAGGTTGGGCAGAGCCGAG

miR-29b EU154353 (chr7: 32416-35731)

miR-29b-ChIP-F: TCCTGAGTAGCTGGGATTGC

miR-29b-ChIP-R: CATGCCTGTAGTGAGGCTGA

Supplementary Figure S8

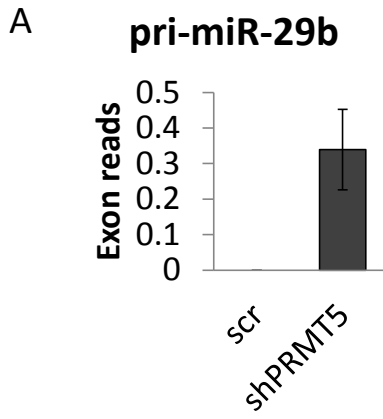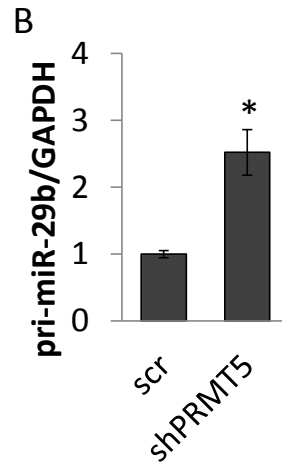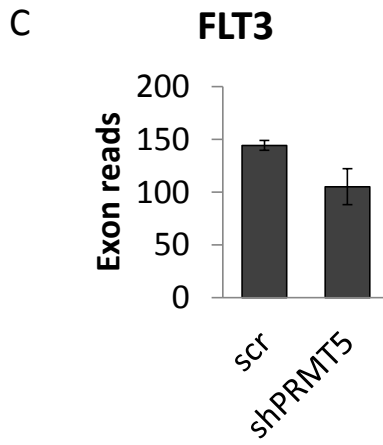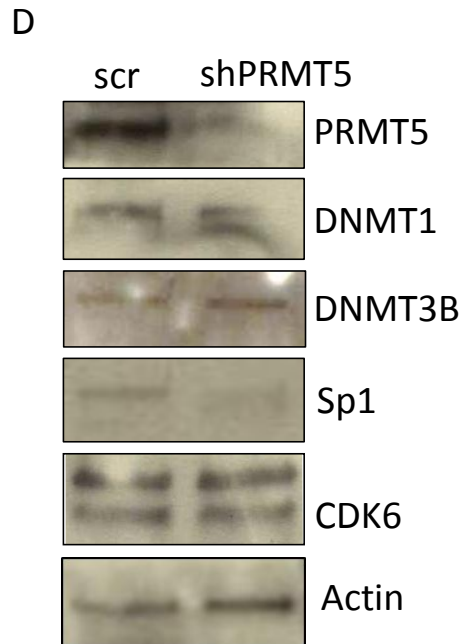

## Supplementary Figure S8

E

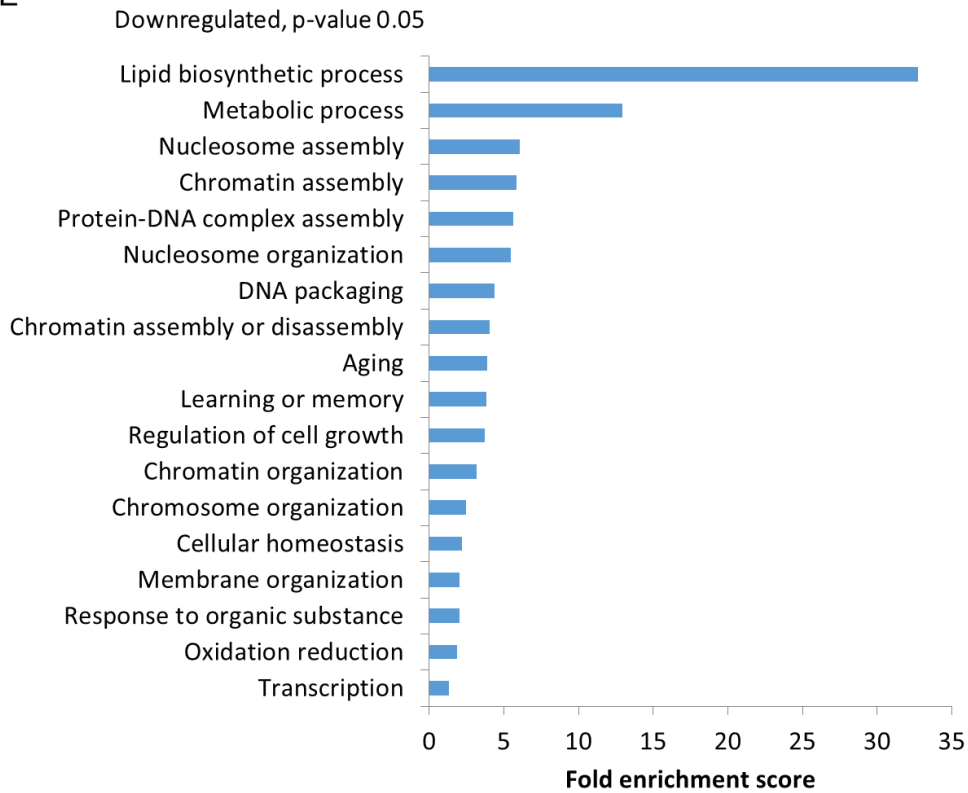

F

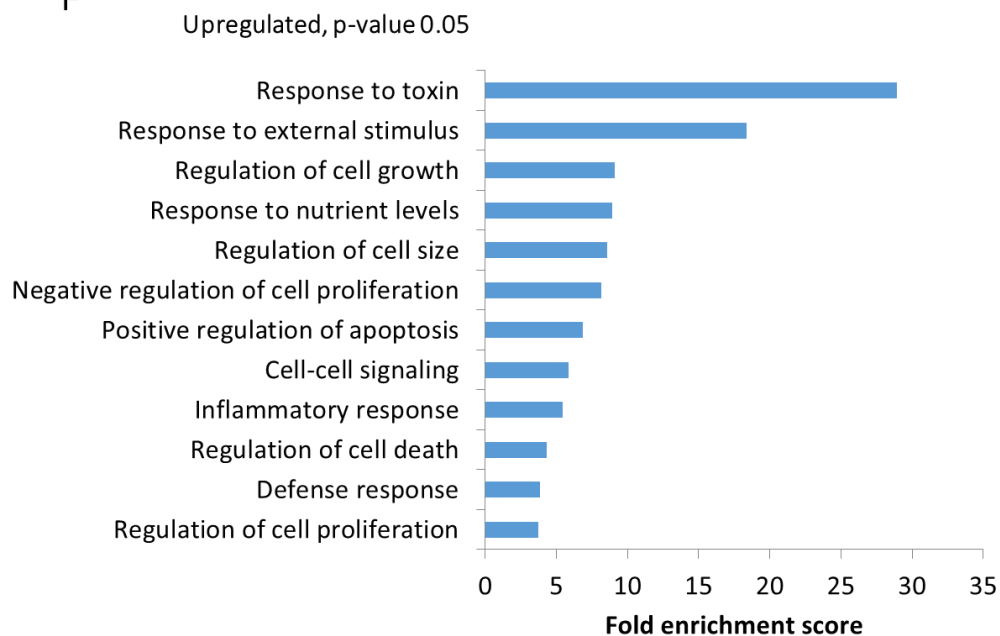

**Supplementary Table S2.** List of genes significantly up or downregulated in shPRMT5 cells vs. control identified by RNA-seq.

| <b>Gene</b>  | <b>Chromosome</b> | <b>P-Value</b> | <b>Up or DOWN</b> |
|--------------|-------------------|----------------|-------------------|
| CLEC12A      | chr12             | 0.000523       | UP                |
| CHAC1        | chr15             | 0.003708       | UP                |
| GDF15        | chr19             | 0.020722       | UP                |
| SLC7A11      | chr4              | 0.000755       | UP                |
| PRG2         | chr11             | 0.01515        | UP                |
| NUPR1        | chr16             | 0.018173       | UP                |
| STC2         | chr5              | 0.006214       | UP                |
| CHI3L1       | chr1              | 0.02243        | UP                |
| INHBE        | chr12             | 0.021993       | UP                |
| TFAP2C       | chr20             | 0.007323       | UP                |
| AGT          | chr1              | 0.009029       | UP                |
| IL8          | chr4              | 0.015308       | UP                |
| S100P        | chr4              | 0.037481       | UP                |
| CTH          | chr1              | 0.008886       | UP                |
| FLJ23867     | chr1              | 0.011423       | UP                |
| DRAM1        | chr12             | 0.007212       | UP                |
| GAL          | chr11             | 0.027371       | UP                |
| PSAT1        | chr9              | 0.009376       | UP                |
| SLC38A1      | chr12             | 0.014362       | UP                |
| NQO1         | chr16             | 0.038021       | UP                |
| SNORD48      | chr6              | 0.028028       | UP                |
| MFAP4        | chr17             | 0.034342       | UP                |
| CYFIP2       | chr5              | 0.007945       | UP                |
| CADM1        | chr11             | 0.01812        | UP                |
| IGFBP2       | chr2              | 0.038599       | UP                |
| C3orf80      | chr3              | 0.045558       | UP                |
| C19orf59     | chr19             | 0.01631        | UP                |
| ASNS         | chr7              | 0.01387        | UP                |
| CCPG1        | chr15             | 0.017411       | UP                |
| DYX1C1-CCPG1 | chr15             | 0.018209       | UP                |
| CKAP4        | chr12             | 0.015474       | UP                |
| PTPN13       | chr4              | 0.022003       | UP                |
| HOXA5        | chr7              | 0.047748       | Down              |
| MAFK         | chr7              | 0.044053       | Down              |
| HMG20B       | chr19             | 0.023189       | Down              |
| WHAMM        | chr15             | 0.046223       | Down              |
| QPRT         | chr16             | 0.024537       | Down              |
| ARHGAP12     | chr10             | 0.031463       | Down              |

|              |       |          |      |
|--------------|-------|----------|------|
| HEBP1        | chr12 | 0.030596 | Down |
| TMEM63A      | chr1  | 0.03684  | Down |
| WDR37        | chr10 | 0.037647 | Down |
| RSBN1        | chr1  | 0.034523 | Down |
| BAZ2A        | chr12 | 0.025046 | Down |
| CHRNA7       | chr15 | 0.020174 | Down |
| PCGF1        | chr2  | 0.033103 | Down |
| ZBED6        | chr1  | 0.041538 | Down |
| STARD4-AS1   | chr5  | 0.012426 | Down |
| TMEM55A      | chr8  | 0.031948 | Down |
| C14orf43     | chr14 | 0.047494 | Down |
| UHMK1        | chr1  | 0.029923 | Down |
| KPNA5        | chr6  | 0.044159 | Down |
| ULK4P2       | chr15 | 0.020519 | Down |
| ULK4P1       | chr15 | 0.020525 | Down |
| LOC100507217 | chr15 | 0.022064 | Down |
| PPFIBP1      | chr12 | 0.017127 | Down |
| CALCOCO1     | chr12 | 0.035787 | Down |
| PLEKHA2      | chr8  | 0.017956 | Down |
| DDX3Y        | chrY  | 0.019342 | Down |
| SLC12A4      | chr16 | 0.033233 | Down |
| VAMP4        | chr1  | 0.019274 | Down |
| MVK          | chr12 | 0.043764 | Down |
| ULK4P3       | chr15 | 0.016044 | Down |
| NARF         | chr17 | 0.028011 | Down |
| KLHL15       | chrX  | 0.045227 | Down |
| CLK3         | chr15 | 0.031997 | Down |
| ICAM3        | chr19 | 0.012794 | Down |
| CD37         | chr19 | 0.033582 | Down |
| CCBL1        | chr9  | 0.038929 | Down |
| MAGED2       | chrX  | 0.020137 | Down |
| EZH1         | chr17 | 0.033572 | Down |
| CHRFAM7A     | chr15 | 0.011555 | Down |
| TBC1D3G      | chr17 | 0.048282 | Down |
| SC5DL        | chr11 | 0.039071 | Down |
| NPHP3-ACAD11 | chr3  | 0.036657 | Down |
| MAST3        | chr19 | 0.012444 | Down |
| ING2         | chr4  | 0.034922 | Down |
| SLC9A3       | chr5  | 0.006517 | Down |
| LONRF1       | chr8  | 0.013871 | Down |
| STARD8       | chrX  | 0.01529  | Down |



|           |       |          |      |
|-----------|-------|----------|------|
| MICA      | chr6  | 0.036367 | Down |
| OSBPL2    | chr20 | 0.022726 | Down |
| KDM3A     | chr2  | 0.02496  | Down |
| PTAR1     | chr9  | 0.025429 | Down |
| ATP8B3    | chr19 | 0.010488 | Down |
| ANO8      | chr19 | 0.013372 | Down |
| THBS3     | chr1  | 0.02579  | Down |
| RBM33     | chr7  | 0.022223 | Down |
| AKAP17A   | chrX  | 0.018265 | Down |
| AKAP17A   | chrY  | 0.018269 | Down |
| TMEM41B   | chr11 | 0.030042 | Down |
| MPZ       | chr1  | 0.048989 | Down |
| ABCB7     | chrX  | 0.008361 | Down |
| PPFIA4    | chr1  | 0.046306 | Down |
| CLDND1    | chr3  | 0.014742 | Down |
| ADD3      | chr10 | 0.023941 | Down |
| MEIS1     | chr2  | 0.009528 | Down |
| HMBOX1    | chr8  | 0.015248 | Down |
| C12orf23  | chr12 | 0.028298 | Down |
| FDPS      | chr1  | 0.008528 | Down |
| CLN8      | chr8  | 0.029829 | Down |
| ARHGAP33  | chr19 | 0.007077 | Down |
| HELB      | chr12 | 0.018782 | Down |
| KCTD7     | chr7  | 0.033007 | Down |
| IDI1      | chr10 | 0.021298 | Down |
| RASSF7    | chr11 | 0.015546 | Down |
| ZBTB41    | chr1  | 0.015025 | Down |
| PER1      | chr17 | 0.025959 | Down |
| BNIP3     | chr10 | 0.032975 | Down |
| ZNF467    | chr7  | 0.031235 | Down |
| ZMYM3     | chrX  | 0.012819 | Down |
| BMF       | chr15 | 0.030986 | Down |
| ZNF395    | chr8  | 0.032029 | Down |
| MTHFR     | chr1  | 0.034716 | Down |
| LDLR      | chr19 | 0.013969 | Down |
| C10orf10  | chr10 | 0.018867 | Down |
| RUSC1-AS1 | chr1  | 0.006624 | Down |
| SLC2A14   | chr12 | 0.044534 | Down |
| TRIP10    | chr19 | 0.020066 | Down |
| SERTAD3   | chr19 | 0.014399 | Down |
| GADD45B   | chr19 | 0.032429 | Down |

|              |       |          |      |
|--------------|-------|----------|------|
| DBP          | chr19 | 0.026014 | Down |
| CMTM4        | chr16 | 0.028198 | Down |
| PIK3C2A      | chr11 | 0.018402 | Down |
| LPCAT4       | chr15 | 0.039405 | Down |
| FUT11        | chr10 | 0.021254 | Down |
| H1FX         | chr3  | 0.0153   | Down |
| P4HA1        | chr10 | 0.018556 | Down |
| DHRS1        | chr14 | 0.035153 | Down |
| PLCB3        | chr11 | 0.014296 | Down |
| PLXNA3       | chrX  | 0.017255 | Down |
| FAM8A1       | chr6  | 0.010842 | Down |
| KLC4         | chr6  | 0.014178 | Down |
| SAT1         | chrX  | 0.02258  | Down |
| FAM63B       | chr15 | 0.018033 | Down |
| NDRG1        | chr8  | 0.047308 | Down |
| CCDC144NL    | chr17 | 0.008994 | Down |
| EBP          | chrX  | 0.015635 | Down |
| C18orf25     | chr18 | 0.012294 | Down |
| ARL5B        | chr10 | 0.015645 | Down |
| CLK1         | chr2  | 0.012377 | Down |
| TPM2         | chr9  | 0.021646 | Down |
| KRT8         | chr12 | 0.024646 | Down |
| CLCN6        | chr1  | 0.014992 | Down |
| FAM214B      | chr9  | 0.013083 | Down |
| PTGS1        | chr9  | 0.016377 | Down |
| ZFP36        | chr19 | 0.001716 | Down |
| NR4A1        | chr12 | 0.034555 | Down |
| HMGCR        | chr5  | 0.010847 | Down |
| TNFSF9       | chr19 | 0.0449   | Down |
| ACSF2        | chr17 | 0.017063 | Down |
| ICAM5        | chr19 | 0.006688 | Down |
| SCD          | chr10 | 0.008607 | Down |
| C21orf56     | chr21 | 0.007975 | Down |
| CYP51A1      | chr7  | 0.010776 | Down |
| ZBTB25       | chr14 | 0.02883  | Down |
| MXD1         | chr2  | 0.03425  | Down |
| LOC100128071 | chr1  | 0.031331 | Down |
| PRKAB2       | chr1  | 0.004924 | Down |
| HECA         | chr6  | 0.009644 | Down |
| PNRC1        | chr6  | 0.007306 | Down |
| FCGR2C       | chr1  | 0.00626  | Down |

|          |       |          |      |
|----------|-------|----------|------|
| NFIL3    | chr9  | 0.027776 | Down |
| TSSK3    | chr1  | 0.019352 | Down |
| CRELD1   | chr3  | 0.017523 | Down |
| SLC30A1  | chr1  | 0.020663 | Down |
| GSDMB    | chr17 | 0.034183 | Down |
| PIM3     | chr22 | 0.009048 | Down |
| YPEL2    | chr17 | 0.010259 | Down |
| SNORA29  | chr6  | 0.044463 | Down |
| ZBTB10   | chr8  | 0.009564 | Down |
| SLC26A6  | chr3  | 0.01012  | Down |
| ABHD4    | chr14 | 0.019235 | Down |
| RHPN1    | chr8  | 0.01799  | Down |
| LSS      | chr21 | 0.002593 | Down |
| FAM193B  | chr5  | 0.0024   | Down |
| DDAH2    | chr6  | 0.003991 | Down |
| LMBR1L   | chr12 | 0.003651 | Down |
| MT1F     | chr16 | 0.016055 | Down |
| PFKFB4   | chr3  | 0.043906 | Down |
| JPH2     | chr20 | 0.00072  | Down |
| FDFT1    | chr8  | 0.003848 | Down |
| GNG7     | chr19 | 0.004161 | Down |
| CERCAM   | chr9  | 0.025483 | Down |
| RAB3A    | chr19 | 0.008062 | Down |
| SPP1     | chr4  | 0.035521 | Down |
| GBP2     | chr1  | 0.005702 | Down |
| SQLE     | chr8  | 0.004866 | Down |
| ZBTB43   | chr9  | 0.011595 | Down |
| SAMD8    | chr10 | 0.005449 | Down |
| TNNT1    | chr19 | 0.03292  | Down |
| GGT7     | chr20 | 0.011899 | Down |
| MVD      | chr16 | 0.006392 | Down |
| SNORD59A | chr12 | 0.015334 | Down |
| FEM1C    | chr5  | 0.004087 | Down |
| TBC1D30  | chr12 | 0.020218 | Down |
| KLF6     | chr10 | 0.004265 | Down |
| CDK18    | chr1  | 0.036398 | Down |
| LSP1     | chr11 | 0.005661 | Down |
| FADS3    | chr11 | 0.049763 | Down |
| KLHL28   | chr14 | 0.004343 | Down |
| CKB      | chr14 | 0.006102 | Down |
| PHF1     | chr6  | 0.002379 | Down |

|            |       |          |      |
|------------|-------|----------|------|
| SGK1       | chr6  | 0.006058 | Down |
| INSIG1     | chr7  | 0.002511 | Down |
| ANKRD37    | chr4  | 0.004132 | Down |
| SNORD21    | chr1  | 0.015102 | Down |
| MT1E       | chr16 | 0.006633 | Down |
| TXNIP      | chr1  | 0.009527 | Down |
| FCGR2B     | chr1  | 0.001985 | Down |
| CSRNP1     | chr3  | 0.001625 | Down |
| HSD17B7P2  | chr10 | 0.002851 | Down |
| HSD17B7    | chr1  | 0.002503 | Down |
| RRAS       | chr19 | 0.002396 | Down |
| RAB26      | chr16 | 0.02717  | Down |
| H1FO       | chr22 | 0.03023  | Down |
| FOS        | chr14 | 0.000558 | Down |
| MT1JP      | chr16 | 0.020193 | Down |
| HIST2H2AA4 | chr1  | 0.004303 | Down |
| HIST2H2AA3 | chr1  | 0.004311 | Down |
| HSPA6      | chr1  | 0.003029 | Down |
| KLHL24     | chr3  | 0.004291 | Down |
| ITGAX      | chr16 | 0.012826 | Down |
| MT2A       | chr16 | 0.020129 | Down |
| ADSSL1     | chr14 | 0.007323 | Down |
| HSPA7      | chr1  | 0.002476 | Down |
| CCNG2      | chr4  | 0.001532 | Down |
| HILPDA     | chr7  | 0.001728 | Down |
| ACAP1      | chr17 | 0.00539  | Down |
| HMGA2      | chr12 | 0.00064  | Down |
| MYLIP      | chr6  | 0.00057  | Down |
| BCL6       | chr3  | 0.001957 | Down |
| EFNA3      | chr1  | 0.003762 | Down |
| RGS2       | chr1  | 0.005095 | Down |
| GIPR       | chr19 | 0.008714 | Down |
| MSMO1      | chr4  | 0.002055 | Down |
| MT1G       | chr16 | 0.00146  | Down |
| HMGCS1     | chr5  | 0.001108 | Down |
| MIR4742    | chr1  | 0.01769  | Down |
| MIR4674    | chr9  | 0.026025 | Down |
| RGS1       | chr1  | 0.001476 | Down |
| ACSS2      | chr20 | 0.002753 | Down |
| EGR1       | chr5  | 0.002162 | Down |
| SLC6A8     | chrX  | 0.007646 | Down |

|           |       |          |      |
|-----------|-------|----------|------|
| IZUMO4    | chr19 | 0.000696 | Down |
| STARD4    | chr5  | 0.00215  | Down |
| ADM       | chr11 | 0.002677 | Down |
| CREBRF    | chr5  | 0.000385 | Down |
| MT1X      | chr16 | 0.001152 | Down |
| ALDOC     | chr17 | 0.006382 | Down |
| PCSK4     | chr19 | 0.000366 | Down |
| HIST1H2AC | chr6  | 0.001582 | Down |
| SAT2      | chr17 | 0.000405 | Down |
| MAFF      | chr22 | 0.000416 | Down |
| MIR4639   | chr6  | 0.005829 | Down |
| HIST2H2BE | chr1  | 0.001168 | Down |
| DACT3     | chr19 | 0.000162 | Down |
| ENO2      | chr12 | 0.003384 | Down |
| HIST1H1C  | chr6  | 6.45E-05 | Down |
